# Supplementary material for: Protocatechualdehyde restores endothelial dysfunction in streptozotocin-induced diabetic rats
Source: PubMed Central journal article supplement — Ann Transl Med. 2021 Apr;9(8):711. doi: 10.21037/atm-21-1431 (PMC8106075; doi:10.21037/atm-21-1431), 2021-04
Supplement: atm-09-08-711-dss.pdf [file atm-09-08-711-dss.pdf]

### Data Sharing Statement

|                     |                                                                                                                                                    |                                                                                                                                                                |
|---------------------|----------------------------------------------------------------------------------------------------------------------------------------------------|----------------------------------------------------------------------------------------------------------------------------------------------------------------|
| <b>Article Info</b> | http://dx.doi.org/10.21037/atm-21-1431                                                                                                             |                                                                                                                                                                |
| <b>Item</b>         | <b>Question</b>                                                                                                                                    | <b>Authors' Response<br/>(place "-" if not applicable)</b>                                                                                                     |
| 1                   | Would you like to share data collected for your study to others?                                                                                   | Yes                                                                                                                                                            |
| 2                   | If not, would you like to share the reason for your decision?                                                                                      | -                                                                                                                                                              |
| 3                   | What data in particular will be shared?                                                                                                            | The data PCA improve vascular NO oxidative inactivation in diabetic condition in particular will be shared, which has seldom been provided in previous studies |
| 4                   | Any other documents will be share? Such as study protocol, statistical analysis plan, informed consent form, clinical study report, analytic code. | Statistical analysis plan, informed consent form, and clinical study report will also be shared if requested.                                                  |
| 5                   | When will data availability begin?                                                                                                                 | From the publication date                                                                                                                                      |
| 6                   | When will data availability end?                                                                                                                   | Two years within the publication date                                                                                                                          |
| 7                   | To whom will you share the data?                                                                                                                   | Diabetics and endocrinologists                                                                                                                                 |
| 8                   | For what type of analysis or purpose?                                                                                                              | For analysis to improve vascular function in rodent models                                                                                                     |
| 9                   | How or where can the data/documents be obtained?                                                                                                   | Emails could be sent to the address below to obtain the shared data: wzmcjb@163.com.                                                                           |

|    |                         |                                                                                                                 |
|----|-------------------------|-----------------------------------------------------------------------------------------------------------------|
| 10 | Any other restrictions? | We may balance the potential benefits and risks for each request and then provide the data that could be shared |
|----|-------------------------|-----------------------------------------------------------------------------------------------------------------|
